# Supplementary material for: A methodology for multivariate phenotype-based genome-wide association studies to mine pleiotropic genes
Source: PubMed Central journal article supplement (PMC3287479; doi:10.1186/1752-0509-5-s2-s13), 2011-12-14

# C20orf103- chr20:9,443,271-9,459,171

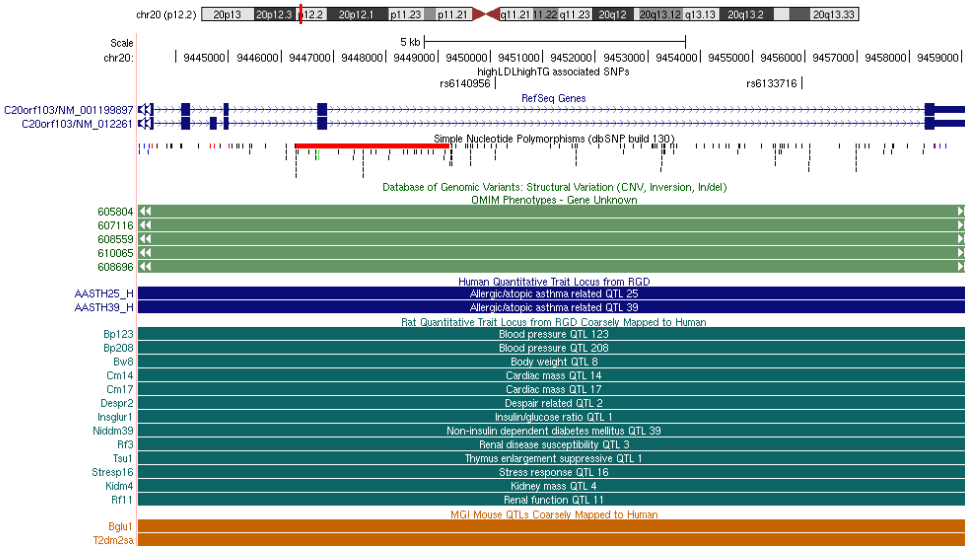

# LD for 5SNPs on chr20:9,449,800-9,504,500

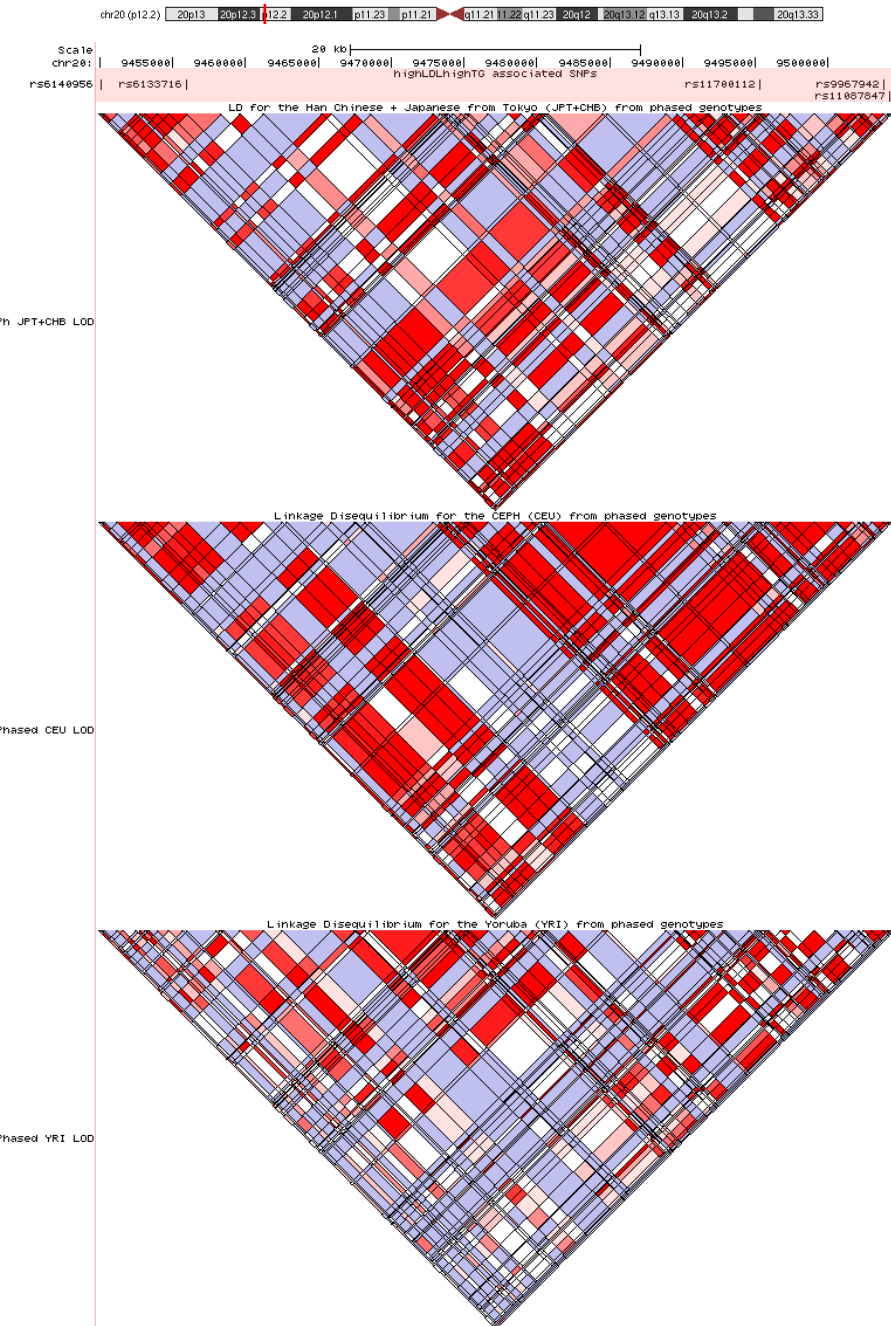

# PAK7- chr20:9,466,037-9,767,687

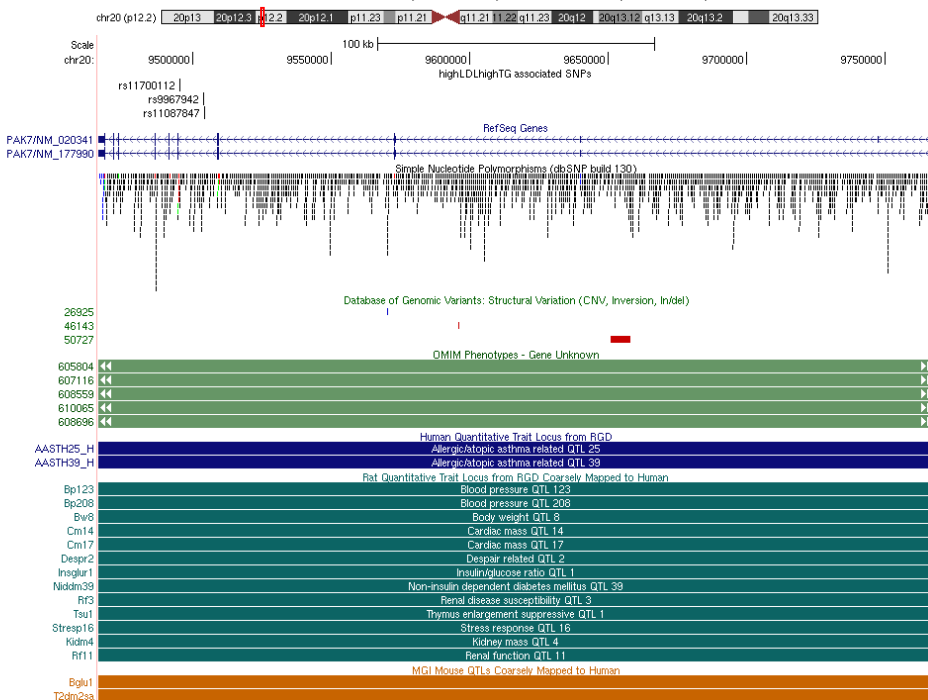

# NRIP1- chr21:15,255,427-15,359,000

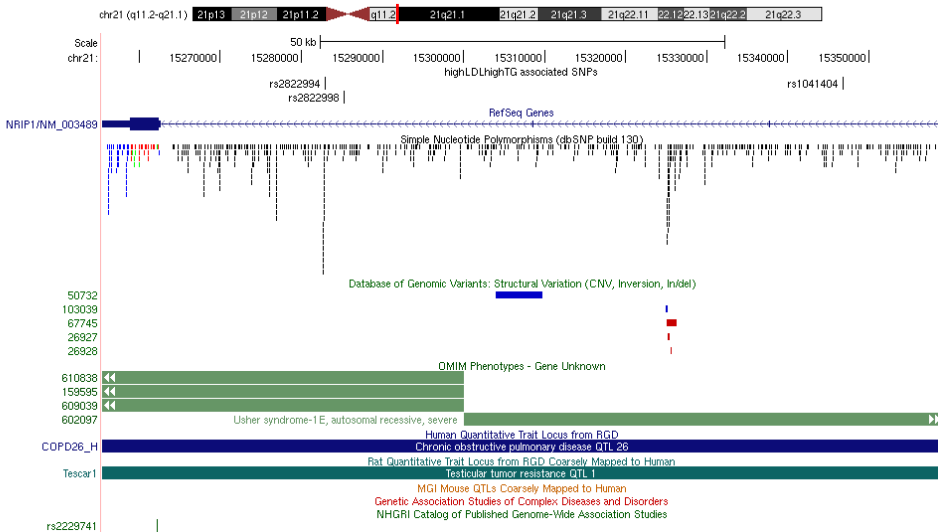

# LD for 3SNPs on chr21:15,282,928-15,346,780

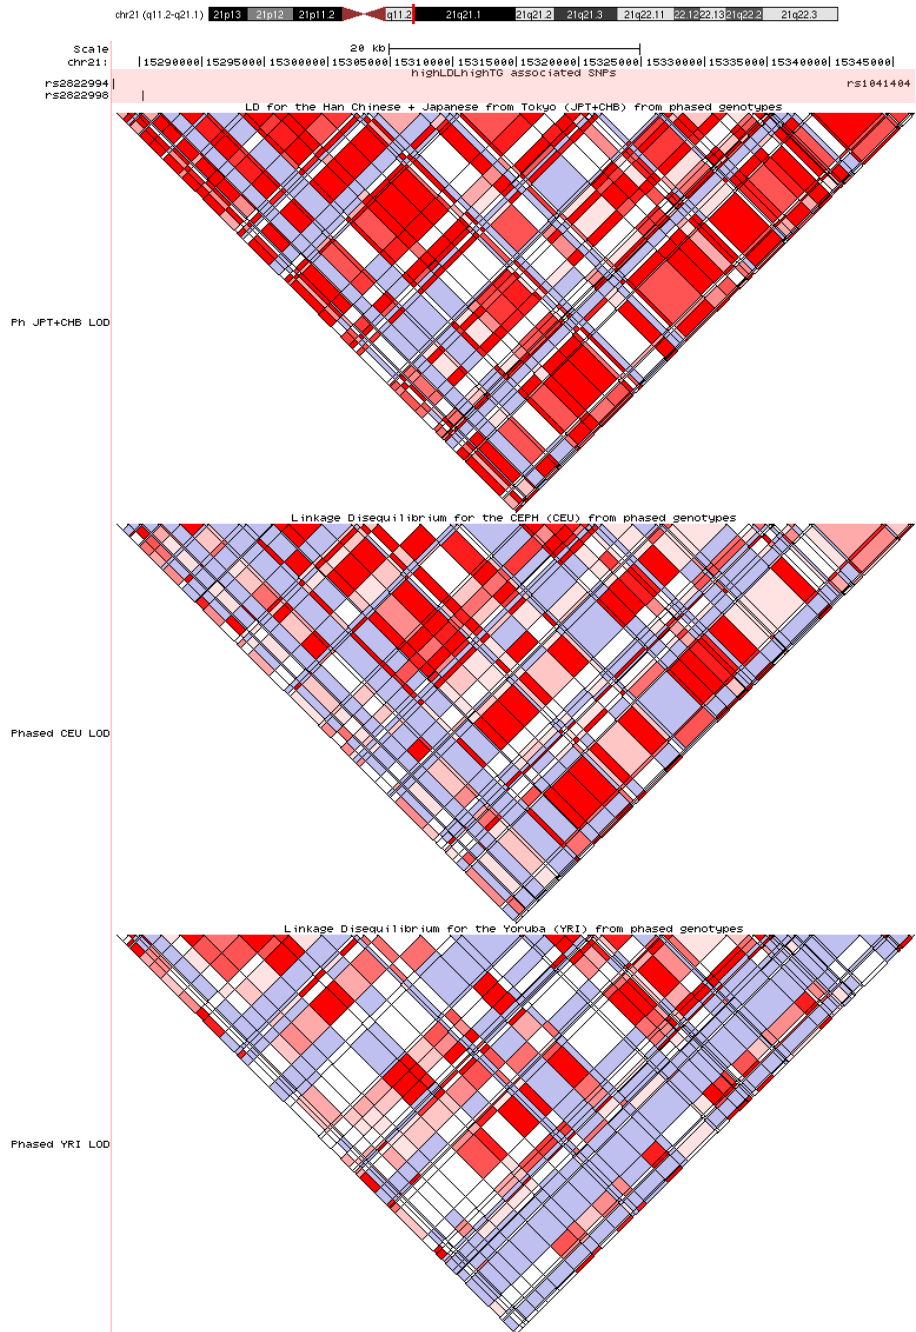

# BCL2- chr18:58,941,559-59,137,600

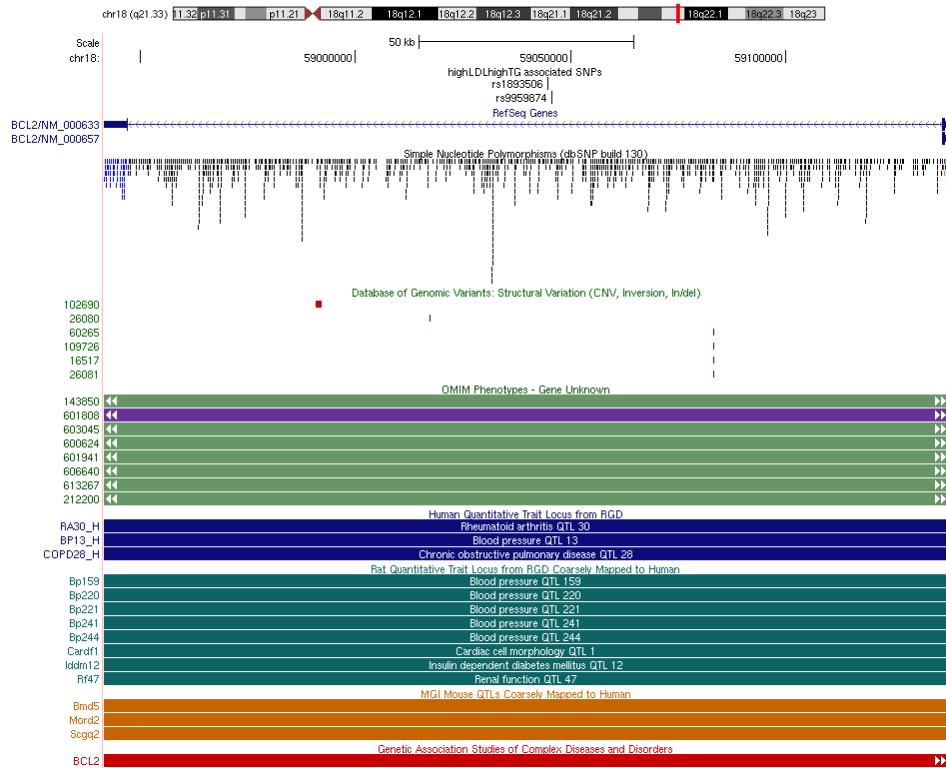

# LD for 2SNPs on chr18:59,015,832-59,074,354

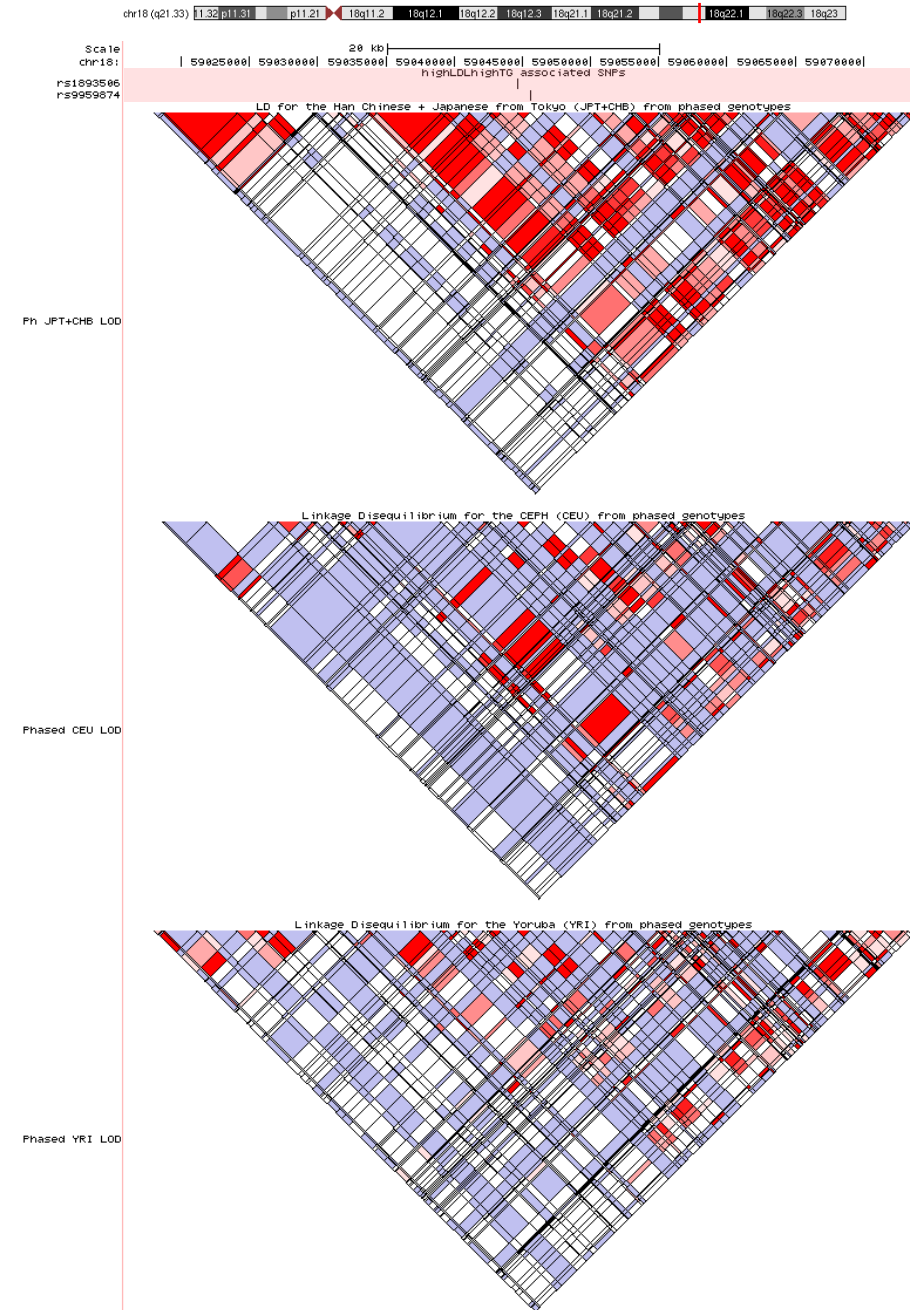

# TRPM3- chr9:72,339,786-72,926,334

# LD for 3SNPs on chr9:72,469,777-72,551,400

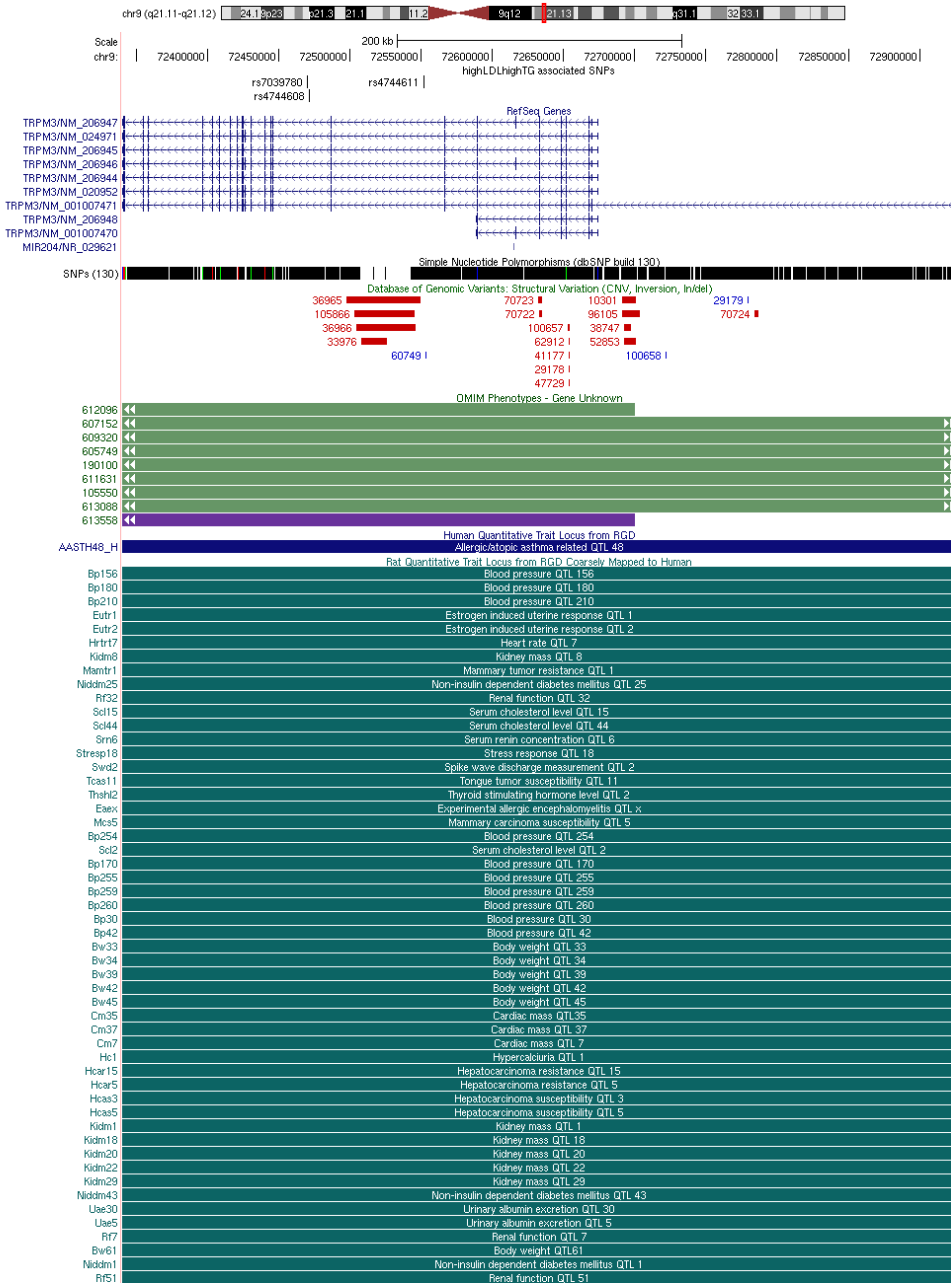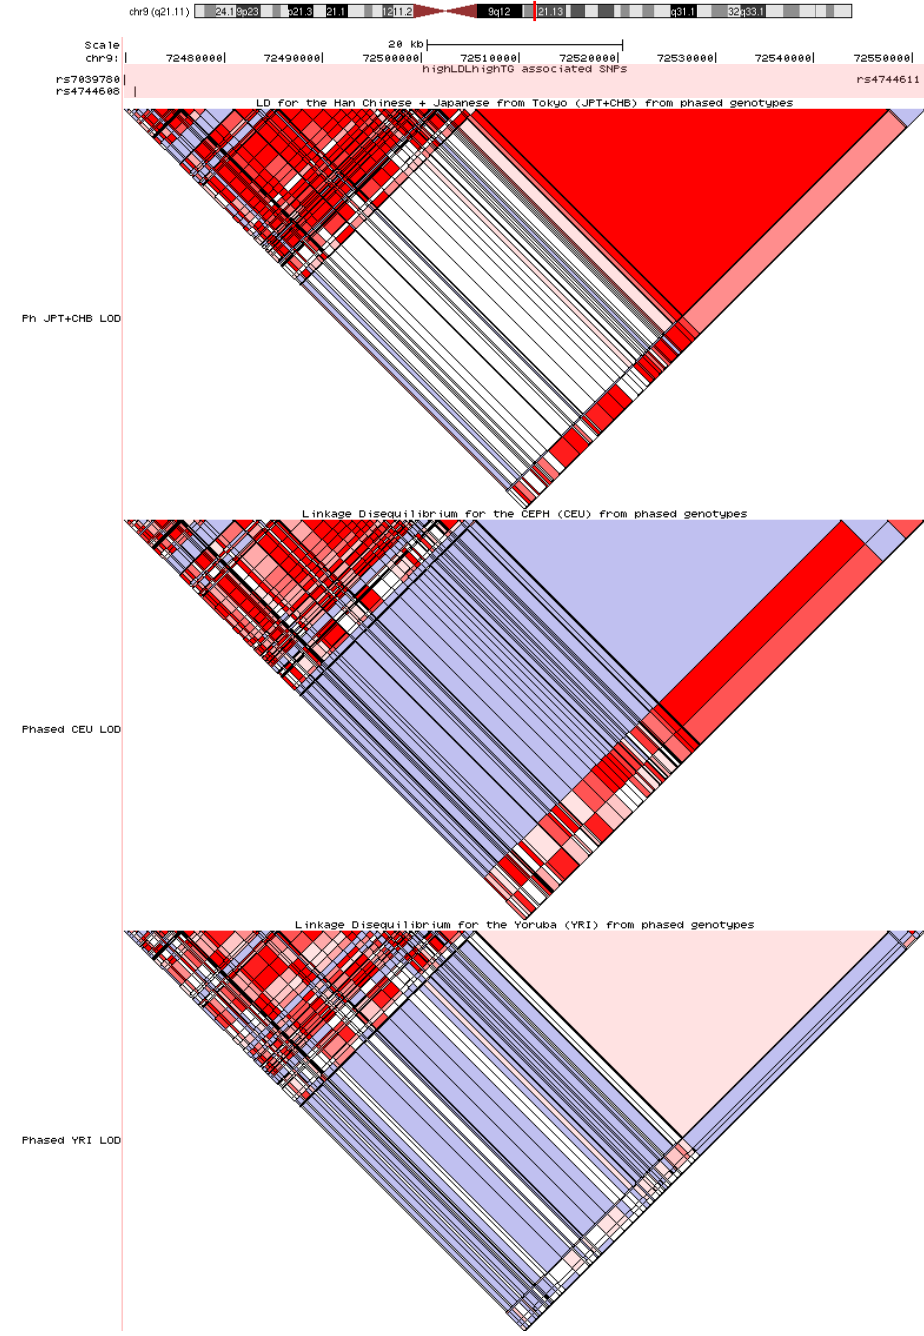

# NAV1- chr1:199,884,073-200,062,850

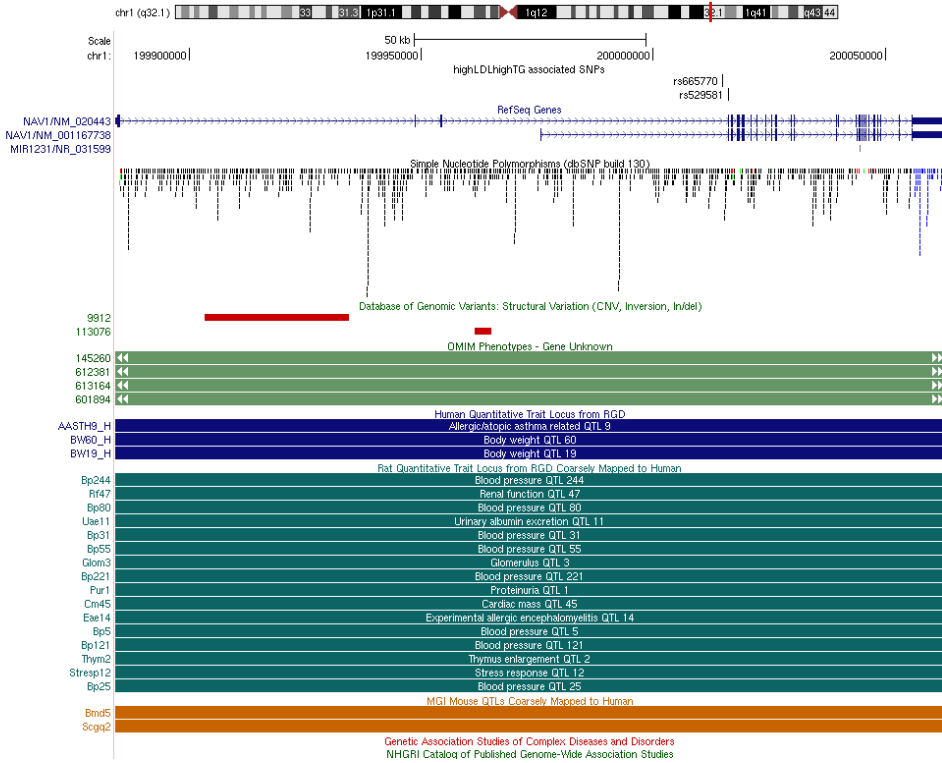

# LD for 2SNPs on chr1:199,980,083-200,050,807

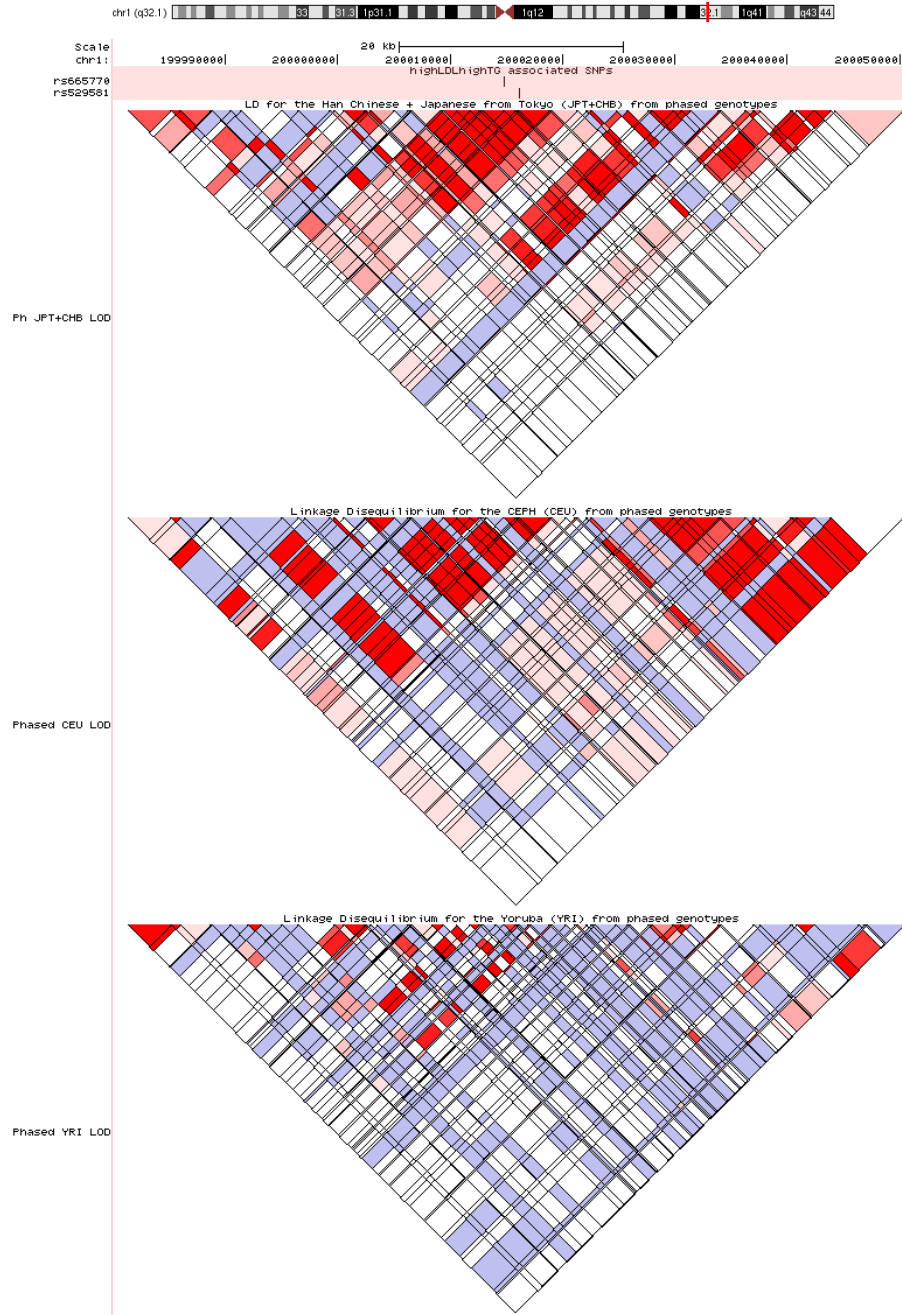

# TRPM3- chr9:72,339,786-72,926,334

# LD for 3SNPs on chr9:72,469,777-72,551,400

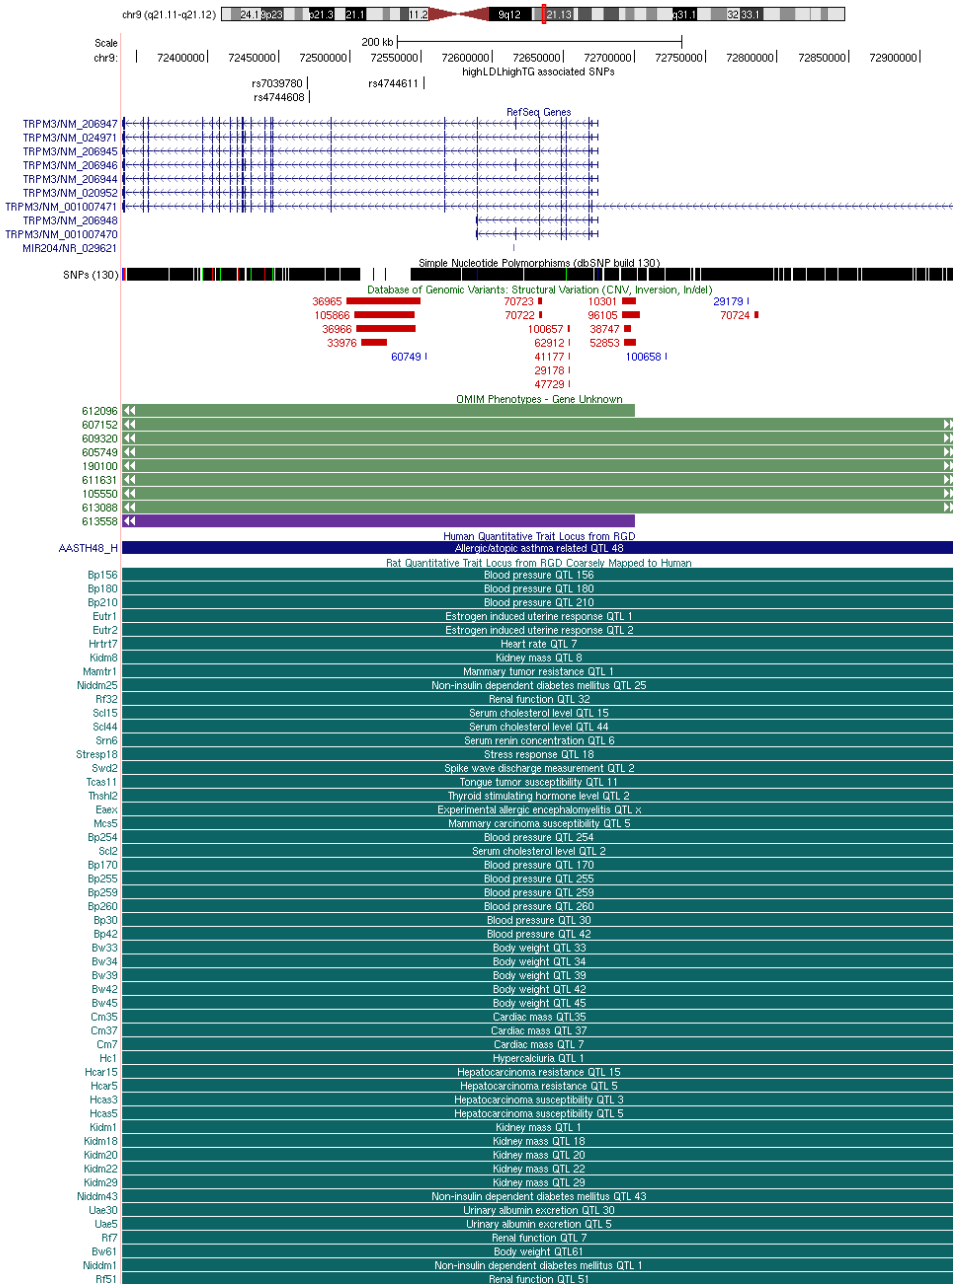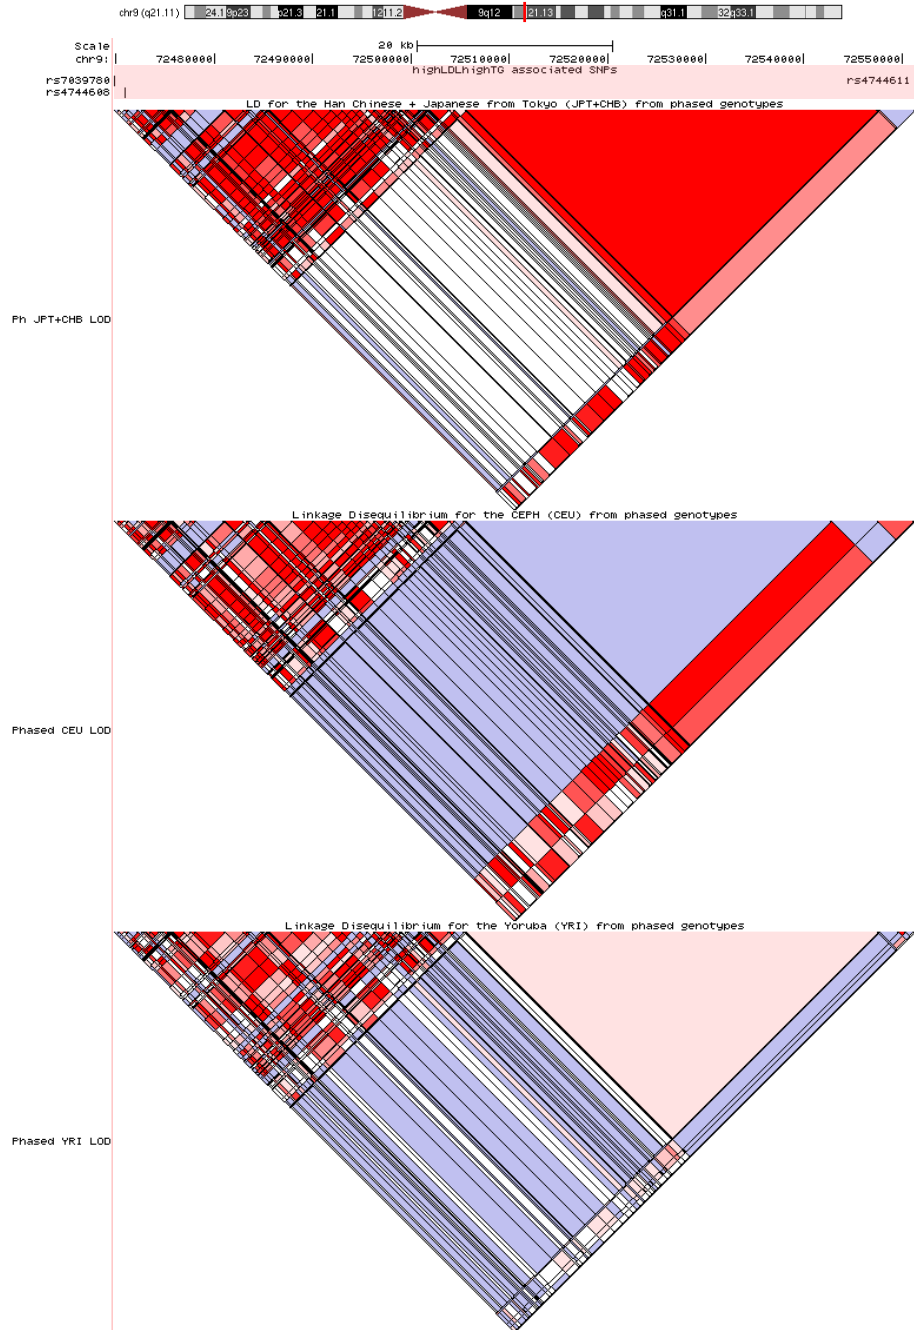

Supplement: 1752-0509-5-S2-S13-S4.pdf [file 1752-0509-5-S2-S13-S4.pdf]
